# Supplementary material for: Adenoviral vaccine targeting multiple neoantigens as strategy to eradicate large tumors combined with checkpoint blockade
Source: PubMed Central journal article supplement (PMC6584502; doi:10.1038/s41467-019-10594-2), 2019-06-19
Supplement: 41467_2019_10594_MOESM1_ESM.pdf [file 41467_2019_10594_MOESM1_ESM.pdf]

## **Supplementary Information for**

**Adenoviral vaccine targeting multiple neoantigens as strategy to eradicate large tumors combined with checkpoint blockade**

**D'Alise et al**

**This PDF file includes:**

**Supplementary Figures 1-9**

**Supplementary Tables 1-4**

## Supplementary Figures

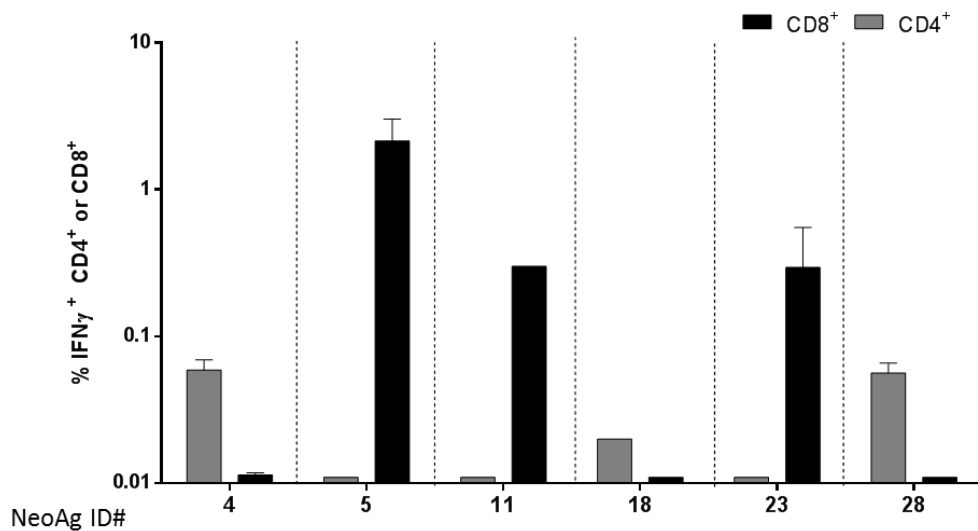

**Supplementary Figure 1. Vaccine-encoded immunogenic neoantigens induce both CD8<sup>+</sup> and CD4<sup>+</sup> T cell responses.** Characterization of T cell subtypes induced by immunogenic nAgs after GAd-CT26-31 vaccination evaluated by intracellular cytokine staining (ICS) and fluorescence-activated cell sorting (FACS). 3 weeks post vaccination splenocytes were stimulated with individual immunogenic peptides. Data (means  $\pm$  SEM) show the percentages of IFN- $\gamma$ <sup>+</sup> CD4<sup>+</sup> and CD8<sup>+</sup> T cells and are representative of 2 experiments.

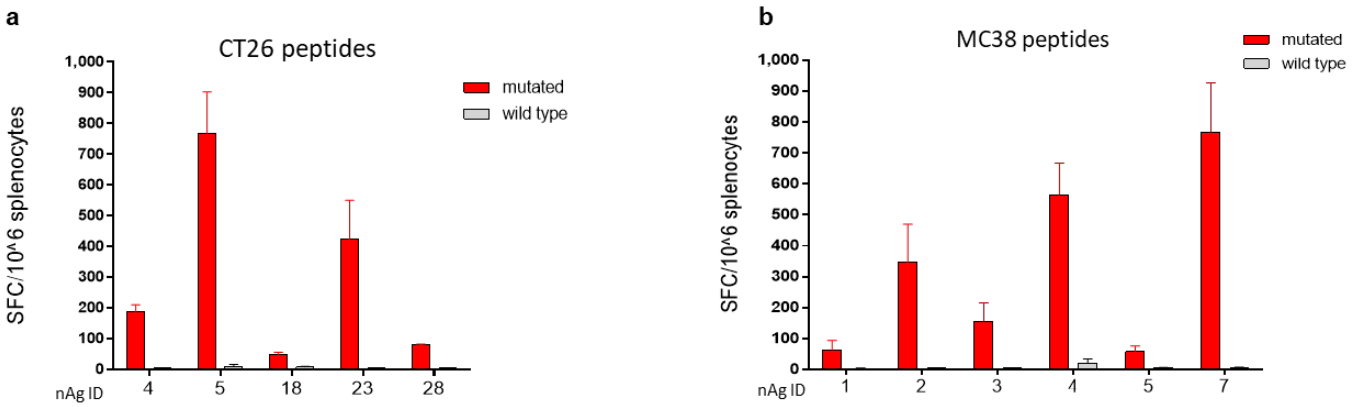

**Supplementary Figure 2. GAd vaccination induces T cell immunity against mutated but not wild type peptides.** T cell responses measured in mice vaccinated with GAd vectors encoding (a) CT26 or (b) MC38 neoantigens. Responses against the most immunogenic mutated peptides (red bars) or the wild type peptides (gray) are shown (n=4/group, Mean  $\pm$  SEM). Vaccination was performed with GAd-CT26-31 or GAd-MC38-7, respectively in a and b.

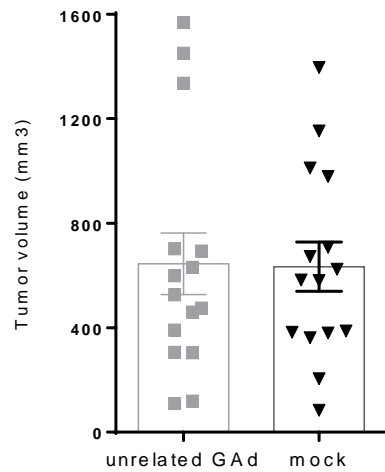

**Supplementary Figure 3. Mice vaccinated with unrelated GAd develop tumors similarly to mock controls.** Mice (n=15/group) were vaccinated with a GAd encoding unrelated nAgs or left untreated (mock). 2 weeks after immunization, CT26 cells were injected s.c. and tumor growth was monitored over time. Tumor volumes measured 25 days post cells' inoculation in unrelated GAd treated mice versus control (mock) mice are shown. Data are representative of 2 experiments.

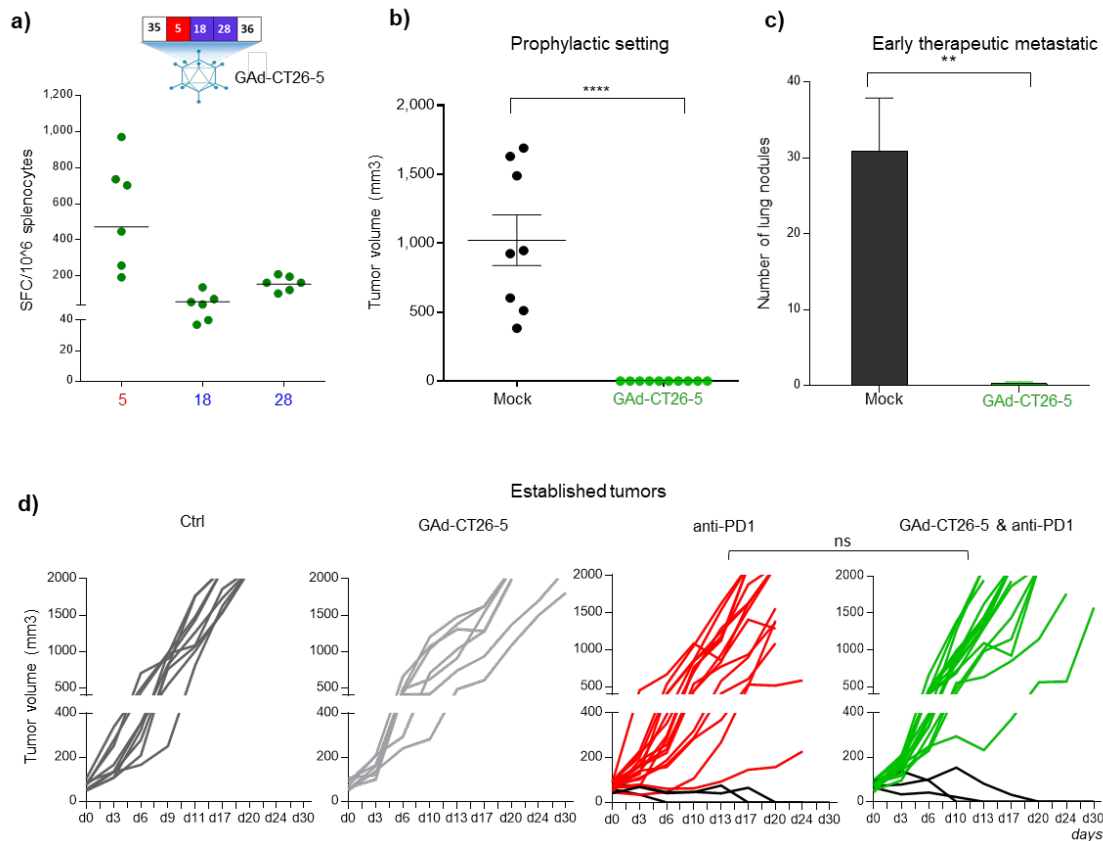

**Supplementary Figure 4. Efficacy of GAd vaccine encoding 5 CT26 neoantigens.** **a** T cell responses were measured by IFN- $\gamma$  ELISpot on splenocytes of naïve mice 3 weeks post immunization with  $5 \times 10^8$  vp of GAd-CT26-5 (n=6). Responses against individual nAgs peptides found immunogenic are shown; nAgs ID is in red for nAgs inducing CD8<sup>+</sup> T cell responses or in blue for nAgs inducing CD4<sup>+</sup> T cell responses. **b** Mice (n=8-10/group) were vaccinated with GAd-CT26-5. 2 weeks after immunization, CT26 cells were injected s.c. and tumor growth was monitored over time. Tumor volumes measured 28 days post cells' inoculation in GAd-CT26-5 versus control (mock) mice are shown. **c** Mice (n=8-10/group) were inoculated i.v. with CT26 cells (day 0) and left untreated (mock) or vaccinated with GAd-CT26-5 at day 3. The number of lung nodules counted at day 16 is shown. **d** Efficacy of GAd-CT26-5, anti-PD1 or combination of GAd-CT26-5 with anti-PD1 in tumor bearing mice randomized at day 0 according to tumor volume (mean 70-100mm<sup>3</sup>). The vaccine was administered at day 0 (i.m.), while anti-PD1 was given twice per week until day 16 (i.p.). Shown is tumor growth in individual mice over time. Black curves represent responder mice. \*\*P < 0.01, and \*\*\*\*P < 0.0001, by 2-tailed Mann-Whitney U test. All data are representative of at least 2-3 independent experiments.

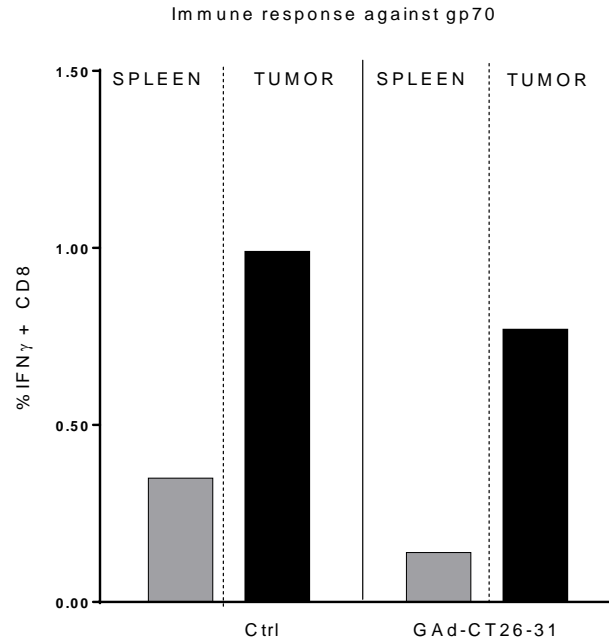

**Supplementary Figure 5. CD8<sup>+</sup> T cells against gp70-AH1 are present in untreated and vaccinated mice.** Percentages of IFN- $\gamma$ <sup>+</sup> CD8<sup>+</sup>T cells gp-70 specific measured by ICS on pool of splenocytes and TIL from untreated or GAd-CT26-31 vaccinated mice (n=4). Data are representative of 2 independent experiments.

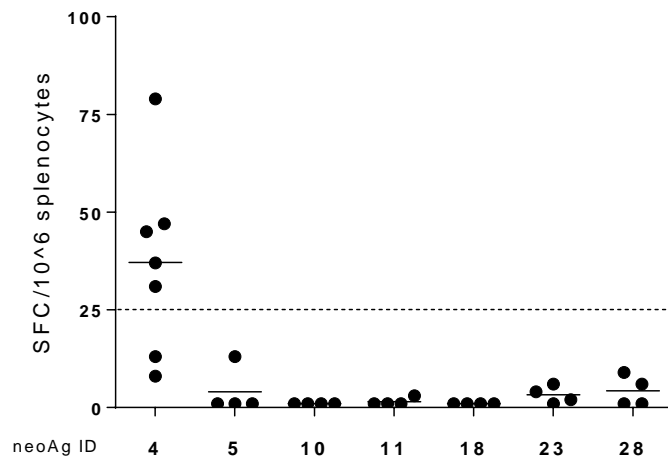

**Supplementary Figure 6. Immune response in mice responding to anti-PD1 monotherapy.** nAg-specific T cell responses quantified by IFN- $\gamma$  ELISpot in responder mice (n=4-7/group) treated with anti-PD1. Responses against the seven immunogenic nAgs are shown. Dashed line represents the threshold for a positive response. Data are representative of 3 independent experiments.

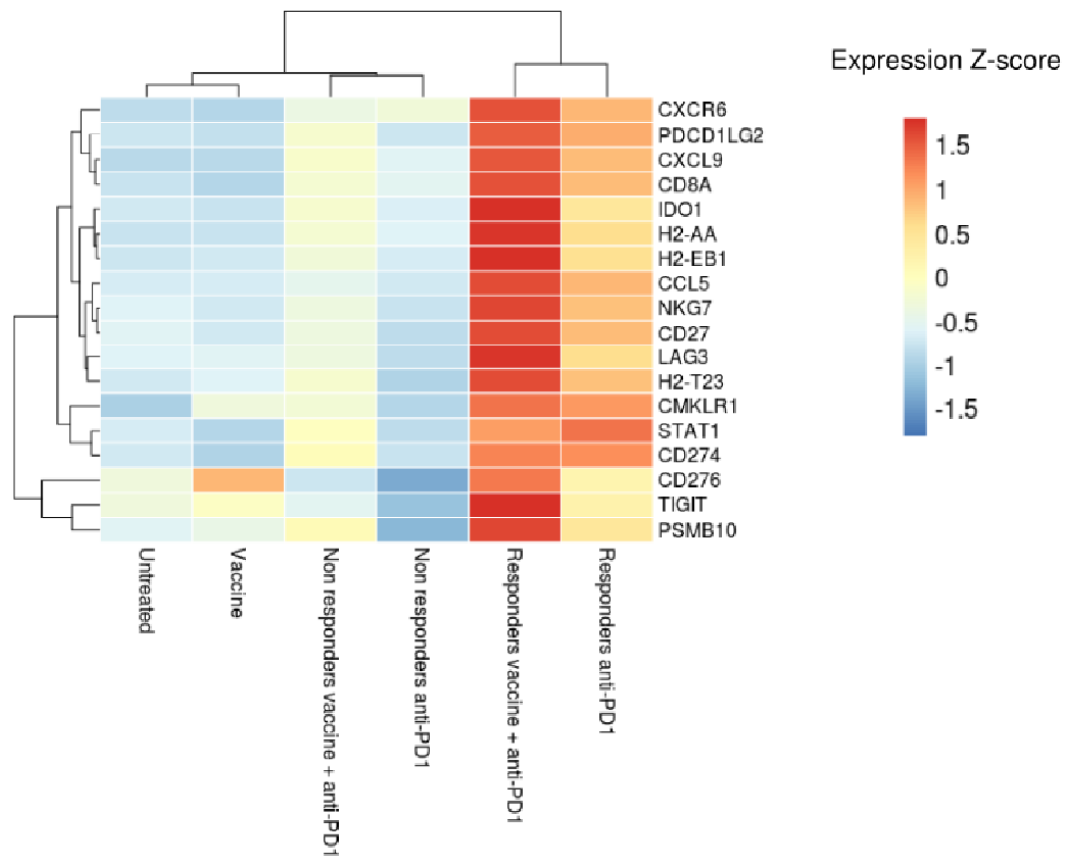

**Supplementary Figure 7. Genes belonging to Tumor Inflammation Signature are significantly modulated by combined treatment.** Heat map showing the mean expression of the 18 genes belonging to the TIS signature in the 6 categories of mouse tumor samples. The human genes HLA-DQA, HLA-E, HLA-DRB5 included in the TIS have been substituted with the closest mouse orthologs HLA-AA, H2-T23, H2-EB1.



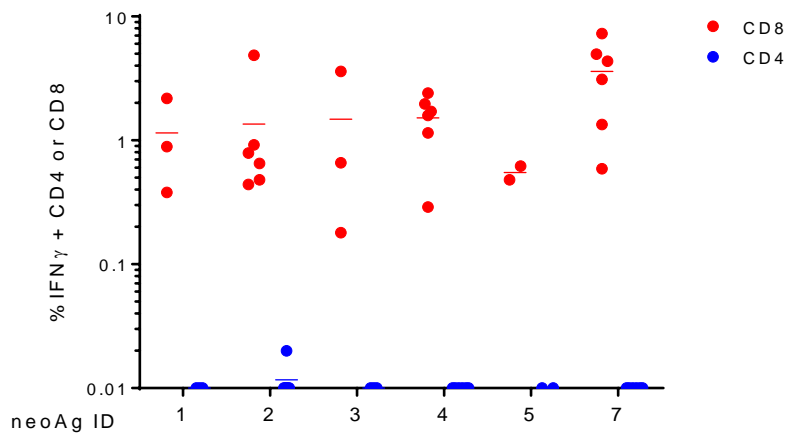

**Supplementary Figure 8. The six immunogenic nAgs encoded by GAd-MC38-7 are CD8+ T cell specific.** The quality of induced T cell responses (CD4, blue, or CD8, red) was assessed by IFN- $\gamma$  ICS in naïve mice (n=3-6). Responses against the six immunogenic nAgs are shown.

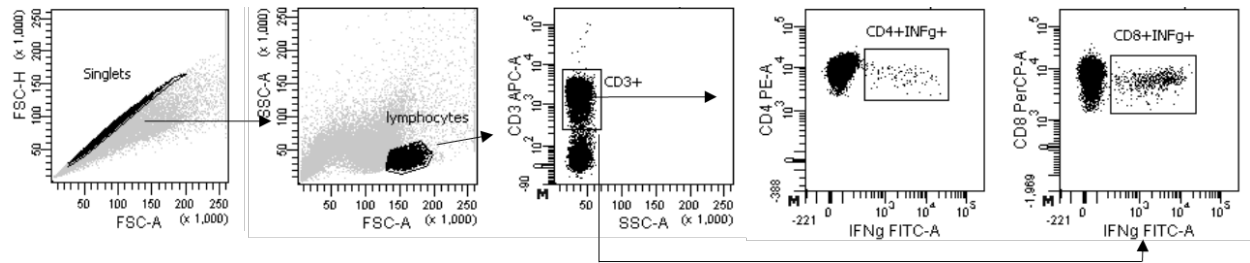

**Supplementary Figure 9. Gating strategy used to analyze the frequency of vaccine-induced nAg-T cells producing IFN- $\gamma$ .** CD4+ and CD8+ T cells producing IFN- $\gamma$  upon peptide restimulation were quantified according this gating strategy for the data presented in Fig.1c, Fig.2d, Fig.3c.

## Supplementary Tables

**Supplementary Table 1. CT26 neoantigens encoded by GAd-CT26-5 vaccine**

| <b>nAg ID</b> | <b>Gene Symbol</b> | <b>Gene ID</b> | <b>NEOANTIGEN SEQUENCE</b>    |
|---------------|--------------------|----------------|-------------------------------|
| 35            | SLC4A3             | 20536          | LLPFYPPDEALE[T/I]GLELNSSALPPT |
| 5             | E2f8               | 108961         | ILPQAPSGPSYA[I/T]YLQPAQAQMLTP |
| 18            | Slc20a1            | 20515          | KPLRRNNSYTSY[T/I]MAICGMPLDSFR |
| 28            | Dhx35              | 71715          | VIQTSKYVMRDV[T/I]AIESAWLLELAP |
| 36            | AGXT2L2            | 72947          | HIHRAGGLFVAD[E/A]IQVGFGRIGKHF |

List of the CT26 neoantigens encoded by GAd-CT26-5 vaccine; mutation is indicated in bold next to the wild-type amino acid sequence.

**Supplementary Table 2. Mutation allele frequency and expression of CT26 immunogenic mutations in tumors of responders (R) and non responders (NR) mice treated with GAd-CT26-31 vaccine and anti-PD1.**

Mutation Allele Frequency (%) in tumor DNA

| nAg ID | GENE     | NR 1 | NR 2 | NR 3 | NR 4 | NR 5 | R 1 | R 2 | R 3 | R 4 |
|--------|----------|------|------|------|------|------|-----|-----|-----|-----|
| 4      | Aldh18a1 | 60   | 57   | 59   | 57   | 63   | 38  | 26  | 35  | 37  |
| 5      | E2f8     | 37   | 36   | 52   | 45   | 38   | 32  | 22  | 29  | 33  |
| 10     | Ndc1     | 69   | 68   | 83   | 65   | 70   | 34  | 23  | 46  | 47  |
| 11     | Glud1    | 77   | 81   | 79   | 71   | 76   | 42  | 35  | 50  | 57  |
| 18     | Slc20a1  | 38   | 39   | 46   | 39   | 72   | 18  | 16  | 26  | 38  |
| 23     | Mtch1    | 36   | 39   | 34   | 43   | 46   | 34  | -   | 37  | 44  |
| 28     | Dhx35    | 33   | 33   | 41   | 33   | 42   | 20  | 18  | 25  | 22  |

Number of mutated/wt reads in tumor RNA

| nAg ID | GENE     | NR 1    | NR 2    | NR 3    | NR 4    | NR 5    | R 1     | R 2     | R 3     | R 4     |
|--------|----------|---------|---------|---------|---------|---------|---------|---------|---------|---------|
| 4      | Aldh18a1 | 64/31   | 28/21   | 43/21   | 103/57  | 47/41   | 41/25   | 26/29   | 31/19   | 54/47   |
| 5      | E2f8     | 56/86   | 33/46   | 46/54   | 79/102  | 44/80   | 28/42   | 45/60   | 26/29   | 47/58   |
| 10     | Ndc1     | 13/8    | 12/0    | 22/4    | 32/6    | 25/6    | 15/4    | 29/8    | 17/4    | 14/1    |
| 11     | Glud1    | 537/84  | 445/50  | 424/80  | 695/112 | 493/95  | 355/146 | 436/272 | 333/130 | 448/133 |
| 18     | Slc20a1  | 179/184 | 115/121 | 177/193 | 150/152 | 164/172 | 66/123  | 85/140  | 74/125  | 146/131 |
| 23     | Mtch1    | 155/270 | 155/195 | 145/270 | 219/365 | 188/295 | 151/185 | -       | 172/362 | 159/302 |
| 28     | Dhx35    | 8/15    | 8/7     | 10/13   | 14/18   | 10/12   | 3/21    | 5/23    | 9/18    | 5/12    |

**Supplementary Table 3. Expression (TPM) of MHC-I and antigen processing related genes in CT26 tumors of responders (R) and non responders (NR) mice treated with GAd-CT26-31 vaccine and anti-PD1.**

| <b>GENE</b> | <b>NR 1</b> | <b>NR 2</b> | <b>NR 3</b> | <b>NR 4</b> | <b>NR 5</b> | <b>R 1</b> | <b>R 2</b> | <b>R 3</b> | <b>R 4</b> |
|-------------|-------------|-------------|-------------|-------------|-------------|------------|------------|------------|------------|
| H2-K        | 689.8       | 615.2       | 647.8       | 808.4       | 747.0       | 702.0      | 880.9      | 874.5      | 815.4      |
| B2M         | 8090.9      | 7225.7      | 7134.4      | 6355.7      | 6064.7      | 7793.0     | 8598.1     | 7004.0     | 6559.5     |
| TAP1        | 226.3       | 149.0       | 188.3       | 224.0       | 165.7       | 229.5      | 266.6      | 245.5      | 307.6      |
| ERP57       | 512.5       | 489.7       | 544.8       | 554.8       | 572.2       | 598.1      | 611.7      | 575.1      | 546.6      |
| ERAP1       | 96.6        | 71.9        | 88.6        | 90.5        | 83.7        | 87.7       | 88.9       | 63.7       | 88.8       |

**Supplementary Table 4. Mutation Allele Frequency (%) and Expression of nAgs mutations encoded by GAd-MC38-7 in MC38 cell line.**

| <b>nAg ID</b> | <b>Gene</b> | <b>Mutation Allele Frequency (%)</b> | <b>Number of reads (mutated/wt)</b> |
|---------------|-------------|--------------------------------------|-------------------------------------|
| 1             | CPNE1       | 34                                   | 165/63                              |
| 2             | IRGQ        | 40                                   | 1/2                                 |
| 3             | AATF        | 40                                   | 85/106                              |
| 4             | REPS1       | 17                                   | 17/67                               |
| 5             | MED12       | 59                                   | 8/1                                 |
| 6             | DPAGT1      | 46                                   | 52/35                               |
| 7             | ADPGK       | 23                                   | 13/46                               |
